# Refining the Allostatic Self-Efficacy Theory of Fatigue and Depression Using Causal Inference

Alexander J. Hess <sup>1,\*</sup> Dina von Werder <sup>1,2,3</sup> Olivia K. Harrison <sup>1,4</sup> Jakob Heinzle <sup>1</sup> Klaas Enno Stephan <sup>1,5</sup>

<sup>1</sup>Translational Neuromodeling Unit, Institute for Biomedical Engineering, University of Zurich and ETH Zurich

<sup>2</sup>Institute of Medical Technology, Brandenburgische Technische Universität Cottbus-Senftenberg

<sup>2</sup>Graduate School of Systemic Neurosciences, Ludwig-Maximilians Universität München

<sup>2</sup>Department of Psychology, University of Otago, Dunedin

<sup>2</sup>Max Planck Institute for Metabolism Research, Cologne

\*Correspondence: [hess@biomed.ee.ethz.ch](mailto:hess@biomed.ee.ethz.ch)

## ABSTRACT

1 **Allostatic self-efficacy (ASE) represents a computational theory of fatigue and depression. In brief, it postulates that (i) fa-**  
2 **tigue is a feeling state triggered by a metacognitive diagnosis of loss of control over bodily states (persistently elevated in-**  
3 **teroceptive surprise); and that (ii) generalisation of low self-efficacy beliefs beyond bodily control induces depression.**  
4 **Here, we convert ASE theory into a structural causal model (SCM). This allows for identification of empirically testable hy-**  
5 **potheses regarding casual relationships between variables of interest. We use conditional independence tests on ques-**  
6 **tionnaire data from healthy volunteers (N=60) to identify contradictions to the proposed SCM. Moreover, we estimate two**  
7 **causal effects proposed by ASE theory using three different methods.**  
8 **Our analyses suggest that, in healthy volunteers, the data are not fully compatible with the proposed SCM. We therefore**  
9 **refine the SCM and present an updated version for future research. Second, we confirm the predicted negative average**  
10 **causal effect from metacognition of allostatic control to fatigue across all three different methods of estimation.**  
11 **Our study represents an initial attempt to refine and formalise ASE theory using methods from causal inference. Our results**  
12 **confirm key predictions from the ASE theory but also suggest revisions which require empirical verification in future stud-**  
13 **ies.**

## 14 INTRODUCTION

15 Fatigue is a prominent symptom of major clinical significance in numerous disorders across medical disciplines<sup>7,44</sup>. It is funda-  
16 mentally disabling for patients and profoundly affects their quality of life<sup>10</sup>. Fatigue is a common feature across a wide range of im-  
17 munological and endocrine disorders, cancer, and neuropsychiatric diseases. In particular, it constitutes one of the core diagnostic  
18 criteria of major depression in standard psychiatric classification schemes (ICD-10 and DSM-5;<sup>2,22</sup>).

19 The clinical concept of fatigue is a heterogeneous construct, and fatiguability of cognitive and motor processes needs to be distin-  
20 guished from the subjective perception of fatigue<sup>18</sup>. This study focuses on the latter. The pathophysiological mechanisms leading  
21 to fatigue are likely diverse<sup>18</sup>. Previous theories have focused on a variety of neurophysiological, immunological and inflammatory  
22 processes. Unfortunately, there are no mechanistically interpretable clinical tests available for fatigue that could be used to guide  
23 individual treatment<sup>18</sup>.

24 More recently, a novel perspective on fatigue has been proposed – the allostatic self-efficacy theory (ASE;<sup>18,27,40</sup>). The ASE theory is  
25 based on computational concepts of brainbody interactions<sup>27,40</sup> which, in turn, are conceptually related to and inspired by Bayesian  
26 theories of perception (predictive coding;<sup>12</sup>) and action (active inference;<sup>13</sup>). The ASE theory emphasises the role of two cognitive  
27 factors for fatigue: interoception and metacognition.

28 Interoception corresponds to the perception of bodily states and is of major importance for understanding determinants of men-  
29 tal health<sup>15,20</sup>. Many contemporary concepts of interoception are grounded in Bayesian theories of perception and conceptualise  
30 interoception as an inference process based on the brain's generative model of sensory inputs from the body<sup>1,15,27,28,36,37</sup>. More  
31 specifically, interoception can be conceptualised as "inferences about bodily (physiological and biochemical) states that are coupled  
32 to regulatory processes which serve to control these states"<sup>41</sup>. Metacognition can be summarised as cognition about cognition<sup>11</sup>,  
33 comprising a variety of evaluation processes by which the brain monitors its own performance. Building on a generic mathematical  
34 model of brainbody interactions, the ASE theory describes how the brain attempts to control bodily states via monitoring interocep-  
35 tive surprise (as an index of the degree of dyshomeostasis;<sup>40</sup>).

**NOTE: This preprint reports new research that has not been certified by peer review and should not be used to guide clinical practice.**

36 In brief, the ASE theory proposes that the subjective experience of fatigue arises when, in a situation of persistent dyshomeostasis  
37 (and thus enduringly elevated interoceptive surprise), the brain arrives at the metacognitive diagnosis that its control over bodily  
38 states is failing; a condition also referred to as low allostatic self-efficacy. (Put differently, fatigue is a feeling state signalling the im-  
39 perative need to rest because regulatory actions fail to resolve dyshomeostasis.) Once a generalisation of low self-efficacy beliefs be-  
40 yond the body has taken place, leading to a general sense of helplessness and perceived lack of control, this is postulated to trigger  
41 the onset of depression<sup>33,40</sup>.

42 At present, the ASE theory is arguably the only concept of fatigue that explains its ubiquitous occurrence across chronic disorders.  
43 It offers testable predictions based on either (i) computational quantities (prediction error or surprise) which can be estimated from  
44 behavioural and/or neurophysiological data or on (ii) self-report data about perceived control over bodily states (metacognition of  
45 allostatic control). In this study, we focus on the latter option.

46 Empirically, there is initial evidence that metacognition of allostatic control – as measured by a self-report questionnaire – is inversely  
47 associated with fatigue, as predicted by ASE theory<sup>33</sup>. However, a comprehensive investigation of the predictions made by the ASE  
48 theory is still lacking to date. Furthermore, as almost all disease concepts in psychiatry, ASE theory has been formulated verbally,  
49 but not as a precise causal model.

50 Here, we present an initial attempt to tackle the latter issue. To this end, we identify variables of central interest in the ASE theory,  
51 namely metacognition of allostatic control ( $M$ ; specifically, the feeling of being in control over one's own bodily states), fatigue ( $F$ ),  
52 general self-efficacy ( $S$ ), and depression ( $D$ ). We then formalize the causal structure implied by the ASE theory in the language of  
53 causal inference, more precisely, in the form of a structural causal model (SCM; <sup>5,24,25</sup>). In contrast to classical probabilistic models,  
54 an SCM induces not only an observational distribution but also a set of so-called interventional distributions. In other words, an SCM  
55 predicts how a system reacts under interventions<sup>43</sup>. We make use of a publicly available empirical dataset to test key aspects of the  
56 structure of the proposed SCM. Moreover, we use established methods for the estimation of average causal effects focusing on cen-  
57 tral aspects of the ASE theory.

## 58 MATERIALS AND METHODS

### 59 Empirical Dataset

60 In this work, we used data from a previous study conducted at the Translational Neuromodeling Unit (TNU) Zurich, the perception  
61 of breathing in the human brain (PBIHB) study; a detailed description of the dataset can be found elsewhere<sup>14</sup>. It comprises be-  
62 havioural, questionnaire and neuroimaging data from 60 healthy individuals. The questionnaire data used for our analysis are freely  
63 available for download from the Zenodo open data repository at <https://doi.org/10.5281/zenodo.10992529>. Participants completed  
64 a battery of psychological questionnaires assessing subjective affective measures, both general and breathing-specific subjective  
65 interoceptive beliefs as well as measures of general positive and negative affect, resilience, self-efficacy and fatigue.

66 For our analysis, we focused on the following measures as representations of the central quantities of the ASE theory:

- 67 · **fatigue ( $F$ )**: Fatigue Severity Scale (FSS)
- 68 · **general self-efficacy ( $S$ )**: General Self-Efficacy Scale (GSES)
- 69 · **depression ( $D$ )**: Centre for Epidemiologic Studies Depression Scale (CES-D)
- 70 · **metacognition of allostatic control ( $M$ )**: Sum of the subscales 3 (not worrying) and 8 (trusting) of the Multidimensional As-  
71 sessment of Interoceptive Awareness (MAIA<sub>3,8</sub>).

72 One important caveat is that, to our knowledge, there does not yet exist a measure that was specifically developed for the construct  
73 of  $M$  (metacognition of allostatic control, i.e. the feeling of being in control over one's own bodily states). In this study, as a proxy  
74 measure, we use the sum of the subscales 3 and 8 of the MAIA questionnaire. These subscales reflect an individual's tendency not  
75 to experience distress in response to bodily inputs signalling dyshomeostasis and to perceive the body as a safe place, respectively.  
76 The sum of these subscales was used in a previous study testing predictions from ASE theory<sup>33</sup> and may currently represent the  
77 best approximation to  $M$  that is easily applied in practice.

## 78 SCM of the ASE theory

79 An SCM<sup>5,25</sup> over variables  $\mathbf{X} = [X_1, \dots, X_n]$  comprises a set of structural equations and distributions of the noise variables (a formal  
80 definition of an SCM is provided in Appendix A1). The structural equations together with the noise distributions induce the obser-  
81 vational distribution  $\mathbb{P}_{\mathbf{X}}$  as simultaneous solution to the structural equations<sup>43</sup>. In addition to the observational distribution, an SCM  
82 induces interventional distributions. Each intervention denotes a scenario in which we fix a certain subset of the variables to a cer-  
83 tain value, e.g.  $\mathbb{P}_{do(X_1:=x_1)}$ .

84 Under assumptions of linearity and normality, the SCM of the ASE theory takes the following form:

$$A = N_a \tag{1}$$

$$G = N_g \tag{2}$$

$$M = \theta_1 A + \theta_2 G + N_m \tag{3}$$

$$F = \theta_3 M + \theta_4 A + \theta_5 G + N_f \tag{4}$$

$$S = \theta_6 A + \theta_7 G + N_s \tag{5}$$

$$D = \theta_8 F + \theta_9 S + \theta_{10} FS + \theta_{11} A + \theta_{12} G + N_d \tag{6}$$

85 where  $A$  stands for age,  $G$  for gender,  $M$  for metacognition of allostatic control,  $F$  for fatigue,  $S$  general self-efficacy,  $D$  for depres-  
86 sion, and  $N_i$  are jointly independent noise variables.  $\forall i \neq g, N_i$  follows a normal distribution and  $N_g$  is a Bernoulli random variable.

## DAG $J_0$

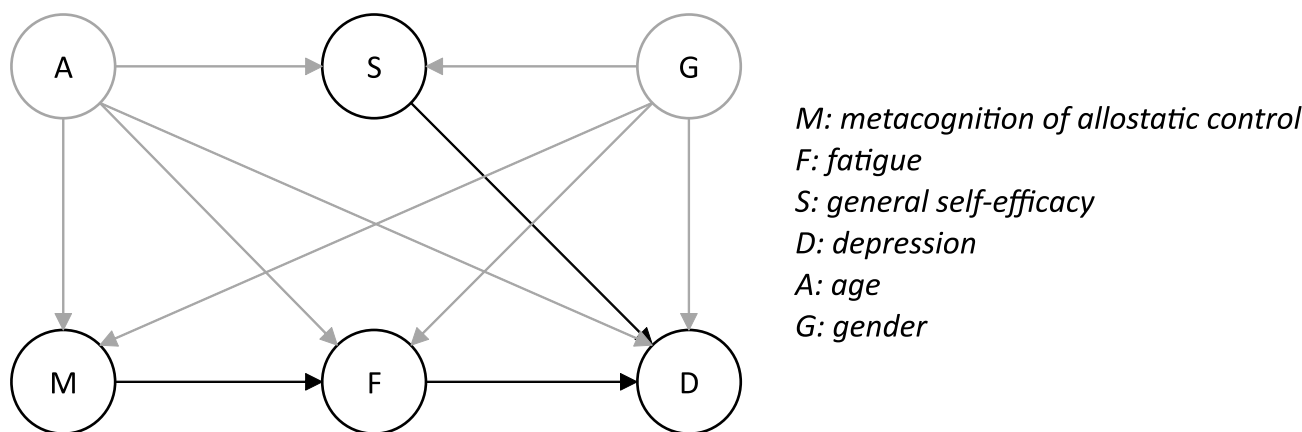

**Figure 1:** Directed acyclic graph (DAG)  $J_0$  summarizing the key proposal of the allostatic self-efficacy theory (ASE;<sup>40</sup>). The DAG  $J_0$  is representative for the induced observational distribution  $\mathbb{P}$  and the interventional distributions induced by interventions on metacognition of allostatic control ( $M; \mathbb{P}_{do(M:=m)}$ ), fatigue ( $F; \mathbb{P}_{do(F:=f)}$ ) or general self-efficacy ( $S; \mathbb{P}_{do(S:=s)}$ ). The other variables in the graph are depression ( $D$ ), age ( $A$ ) and gender ( $G$ ). Black edges represent causal directions as proposed by the ASE theory, grey edges represent effects that are not explicitly part of the ASE theory but are likely to exist.

87 Figure 1 displays a graphical summary of the causal structure implied by the ASE theory in the form of a directed acyclic graph (DAG)  
88  $J_0$ . The directed edge from metacognition of allostatic control ( $M$ ) to fatigue ( $F$ ) represents the prediction that fatigue arises as a  
89 consequence of a metacognitive diagnosis by the brain – i.e. the brain concludes that it has low control over its bodily states. When  
90 this low allostatic self-efficacy (for which fatigue is the accompanying feeling state) is combined with beliefs of lack of control in  
91 other domains than the body (low general self-efficacy), this is predicted to lead to the onset of depression. These effects are rep-  
92 resented by the directed edges from fatigue ( $F$ ) to depression ( $D$ ) and from general self-efficacy ( $S$ ) to depression ( $D$ ). The variables  
93 age ( $A$ ) and gender ( $G$ ) are not explicitly part of the ASE theory, but are known to be associated with the central quantities of the  
94 theory. Hence, the DAG  $J_0$  in Figure 1 is representative for the induced observational distribution  $\mathbb{P}$  and the interventional distribu-  
95 tions induced by interventions on metacognition of allostatic control ( $M; \mathbb{P}_{do(M:=m)}$ ), fatigue ( $F; \mathbb{P}_{do(F:=f)}$ ) or general self-efficacy ( $S;$   
96  $\mathbb{P}_{do(S:=s)}$ ).

97 When taking a closer look at the causal graph in Figure 1, there are a number of points worth highlighting. (i) There is no direct link  
98 between metacognition of allostatic control ( $M$ ) and general self-efficacy ( $S$ ). (ii) There is no direct link from metacognition of al-  
99 lostatic control ( $M$ ) to depression ( $D$ ). All of its influence is mediated by fatigue ( $F$ ). (iii) There is no direct link between fatigue ( $F$ )  
100 and general self-efficacy ( $S$ ). While these three links are, in principle, plausible causal influences, they were not included in the orig-  
101 inal formulation of the ASE theory<sup>40</sup>. Whether these links should be included in a revision of the ASE theory can, in principle, be  
102 tested using methods of causal inference, given appropriate readouts of the involved quantities and relying on the assumption of  
103 the Markov condition.

#### 104 **Statistical Analysis**

105 Our hypotheses as well as the entire analysis were pre-registered in a time-stamped analysis plan that is publicly available on the  
106 Zenodo open data repository at <https://doi.org/10.5281/zenodo.10559656>. Below, we explicitly highlight any deviations from the  
107 pre-specified analysis plan. The analysis code is available at <https://github.com/alexjhess/pbihb-ase-causality>. The analysis pipeline  
108 underwent an internal code review by a researcher not involved in the initial data analysis to identify errors and ensure the repro-  
109 ducibility of our results.

#### 110 **Causal structure of ASE theory in the PBIHB dataset**

111 Learning causal structure from observational data is inherently difficult. One reason is the existence of models that are observation-  
112 ally but not interventionally equivalent<sup>6,25,26,43</sup>. This has several implications (e.g. see<sup>43</sup>), one of them being that without assump-  
113 tions, it is impossible to learn causal structure from observational data.

114 In graphical models, the Markov condition (see e.g.<sup>16</sup>) is a formalisation of the following principle (sometimes referred to as Reichen-  
115 bach's common cause principle): If two random variables  $X$  and  $Y$  are dependent, then there must be some cause-effect structure  
116 that explains the observed dependence. That is, either  $X$  causes  $Y$ , or  $Y$  causes  $X$ , or another unobserved variable  $H$  causes both  
117  $X$  and  $Y$ , or some combination of the aforementioned<sup>29</sup>. A formal definition of the Markov condition is presented in Appendix A2.  
118 The Markov condition establishes a connection from graphical separation properties ( $d$ -separation; see Appendix A3 for a formal  
119 definition) to conditional independencies in the distribution. Any distribution induced by an acyclic SCM satisfies the Markov con-  
120 dition with respect to the corresponding graph<sup>17,25</sup>. Hence, the Markov condition is typically considered to be a mild assumption.  
121 Assuming that the observational distribution  $\mathbb{P}$  induced by the SCM of the ASE theory (equations 1-6) is Markov with respect to the  
122 DAG  $J_0$ , we tested whether we find any contradictions to the structure of the DAG  $J_0$  in the PBIHB dataset. More precisely, we ex-  
123 amined the three predictions described in the last paragraph of and formalised as part of our pre-registered **Hypothesis 1**: Data  
124 from the PBIHB study satisfy the following conditional independence statements:

125 (i)  $M \perp\!\!\!\perp S \mid A, G$

126 (ii)  $M \perp\!\!\!\perp D \mid F, A, G$  and  $M \perp\!\!\!\perp D \mid F, A, G, S$

127 (iii)  $F \perp\!\!\!\perp S \mid A, G$  and  $F \perp\!\!\!\perp S \mid A, G, M$

128 As a statistical test for conditional independence, we used the asymptotic  $\chi^2$  test on the mutual information for conditional Gaus-  
129 sians ( $MI_{cg}$ ) for mixed discrete and normal variables as implemented in the R package **bnlearn**<sup>35</sup>, using a significance level  $\alpha = 0.01$   
130 (Bonferroni corrected).

131 Since conditional independence testing is a difficult statistical problem<sup>38</sup>, we validated our results using two alternative methods:  
132 a kernel conditional independence test (KCI;<sup>45</sup>) as implemented in the R package **CondIndTests**, and a test based on the gener-  
133 alised covariance measure (GCM;<sup>38</sup>) as implemented in the R package **GeneralisedCovarianceMeasure**. These additional tests of  
134 conditional independence were not part of our pre-specified analysis. We decided to conduct these additional tests to evaluate the  
135 robustness of our results across different methods of conditional independence testing (i.e. a sensitivity analysis). We used the same  
136 significance level  $\alpha = 0.01$  for the KCI as well as the GCM based tests to ensure compatibility with the pre-specified tests.

137 **Estimating the average causal effect from  $M$  to  $F$**

138 ASE theory predicts that fatigue is a feeling state that is triggered by a metacognitive diagnosis of loss of control over bodily states.  
 139 We aimed to test this prediction as part of our **Hypothesis 2**: There is a negative average causal effect from metacognition of allo-  
 140 static control ( $M$ ) to fatigue ( $F$ )

$$\frac{\partial}{\partial m} \mathbb{E}_{do(M:=m)} [F] = \theta_3. \quad (7)$$

141 Adjusting for covariates is one of various methods for estimating causal effects from observational data. Suppose we are interested  
 142 in finding the effect of  $M$  on  $F$  and assume the factors deemed relevant to the problem are structured as in Figure 1. In other words,  
 143 we are interested in calculating the intervention distribution  $\mathbb{P}_{do(M:=m)}(f)$ . Given a valid adjustment set (VAS)  $\mathbf{Z}$ , here e.g.  $\mathbf{Z} = (A, G)$ ,  
 144 the intervention distribution can be calculated (see<sup>23,30,39</sup>) as  $\mathbb{P}_{do(M:=m)}(f) = \sum_{\mathbf{z}} \mathbb{P}(f | m, \mathbf{z}) \mathbb{P}(\mathbf{z})$ , since

$$\mathbb{P}_{do(M:=m)}(f) = \sum_{\mathbf{z}} \mathbb{P}_{do(M:=m)}(f, m, \mathbf{z}) \quad (8)$$

$$= \sum_{\mathbf{z}} \mathbb{P}_{do(M:=m)}(f | m, \mathbf{z}) \mathbb{P}_{do(M:=m)}(m, \mathbf{z}) \quad (9)$$

$$= \sum_{\mathbf{z}} \mathbb{P}_{do(M:=m)}(f | m, \mathbf{z}) \mathbb{P}_{do(M:=m)}(\mathbf{z}) \quad (10)$$

$$= \sum_{\mathbf{z}} \mathbb{P}(f | m, \mathbf{z}) \mathbb{P}(\mathbf{z}) \quad (11)$$

145 where in the last step one can use the fact that causal relationships are autonomous under interventions (this property is some-  
 146 times referred to as "autonomy")<sup>26</sup>.

147 In linear Gaussian systems, a causal effect from  $M$  to  $F$  can be approximated by  $\frac{\partial}{\partial m} \mathbb{E}_{do(M:=m)} [F]$  (see e.g.<sup>26</sup>). Assuming that  $\mathbf{Z}$  is a  
 148 VAS for  $\{M, F\}$  and  $\{M, F\}, \mathbf{Z}$  follow a Gaussian distribution, then the conditional  $F | M = m, \mathbf{Z} = \mathbf{z}$  follows a Gaussian distribution as  
 149 well. Hence, the mean of the distribution is given by

$$\mathbb{E}[F | M = m, \mathbf{Z} = \mathbf{z}] = \theta_3 m + \mathbf{b}^t \mathbf{z} \quad (12)$$

150 for some  $\theta_3$  and  $\mathbf{b}$ . It follows from equation 11 that

$$\frac{\partial}{\partial m} \mathbb{E}_{do(M:=m)} [F] = \theta_3 \quad (13)$$

151 One can estimate the conditional mean (eq. 12) by regressing  $F$  on  $M$  and  $\mathbf{Z}$  and subsequently reading off the regression coeffi-  
 152 cients for  $M$ . Alternatively, more sophisticated techniques for estimation of the average causal effect can be used, such as the propen-  
 153 sity score method<sup>32</sup> and double/debiased machine learning (DML;<sup>8</sup>). In Appendix B, the two methods are described in more detail.  
 154 As pre-specified in our analysis plan, we conducted linear regression in combination with a one-sided t-test on the regression coeffi-  
 155 cient of  $M$  to evaluate Hypothesis 2. We compared our estimate of the causal effect from  $M$  to  $F$  obtained via linear regression with  
 156 the results obtained from using more sophisticated estimation techniques, i.e. the propensity score method<sup>32</sup> and DML<sup>8</sup>, following  
 157 our pre-registered analysis plan.

158 **Estimating the average causal effect from  $F^*S$  on  $D$**

159 Another prediction of ASE theory is that fatigue, in combination with a generalisation of low self-efficacy beliefs beyond bodily con-  
 160 trol, induces depression. We formalised this prediction as part of our **Hypothesis 3**: There is a negative average causal effect of the  
 161 interaction term between fatigue and general self-efficacy ( $F^*S$ ) on depression ( $D$ )

$$\frac{\partial}{\partial f \partial s} \mathbb{E}_{do(F:=f, S:=s)} [D] = \theta_{10}. \quad (14)$$

162 Evaluation of Hypothesis 3 followed the same line of reasoning as for Hypothesis 2. We used linear regression in combination with  
 163 a one-sided t-test on the regression coefficient of  $F^*S$ . Subsequently, we compared the resulting estimate to the results obtained

164 using the propensity score method and DML.

165 **RESULTS**

166 **Raw Data**

167 Figure 2 shows a scatter plot matrix of the raw data. Displayed are the measures for all variables  $A, G, M, F, S, D$  used in the analysis.

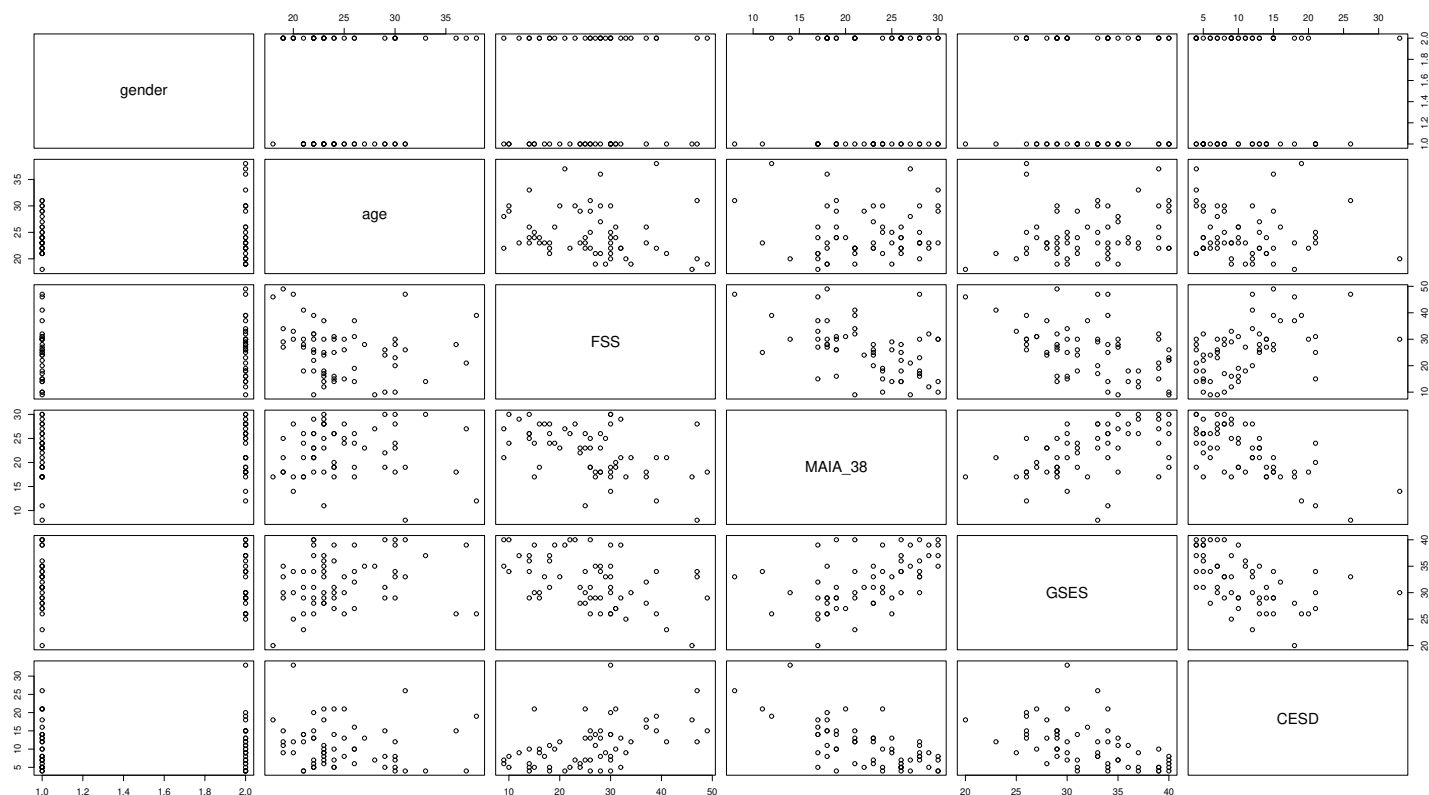

**Figure 2:** Scatter plot matrix of raw data used in the analysis. Displayed are all the pairwise scatter plots of the variables used for the analysis in a matrix format. For example, the scatter plot located on the intersection of row 3 and column 2 is a plot of variables age versus fatigue (as measured by the FSS). The variables displayed are gender, age, fatigue (assessed by the FSS), metacognition of allostatic control (assessed by the MAIA<sub>3,8</sub>), self-efficacy (assessed by the GSES) and depression (assessed by the CES-D).

168 **Results from the Statistical Analysis**

169 **Causal structure of ASE theory in the PBIHB dataset**

170 Table 1 displays the results from conditional independence testing to evaluate the three predictions formulated as part of Hypothe-  
 171 sis 1. The results can be summarised as follows:

**Table 1:** Results from different conditional independence test methods ( $MI_{cg}$ , GCM, KCI) for the three predictions formulated as part of Hypothesis 1. Results are presented for three different test methods. An asterisk indicates statistically significant evidence against the null hypothesis ( $H_0$ : variables are conditionally independent) using the pre-specified level  $\alpha = 0.01$ , which corresponds to a threshold of  $p < 0.05$  Bonferroni corrected for the multiple comparisons of the five tests,  $p$ -values are shown in parentheses.

| Hypothesis 1 | $d$ -separation statement         | $MI_{cg}$ ( $p$ -value) | GCM ( $p$ -value)  | KCI ( $p$ -value)   |
|--------------|-----------------------------------|-------------------------|--------------------|---------------------|
| (i)          | $M \perp_{J_0} S \mid A, G$       | 22.044* (1.634e-05)     | 4.254* (2.104e-05) | 26.451* (5.194e-06) |
| (ii)         | $M \perp_{J_0} D \mid F, A, G$    | 24.167* (5.652e-06)     | -3.131* (0.001743) | 8.513* (0.001346)   |
|              | $M \perp_{J_0} D \mid F, A, G, S$ | 16.883* (0.000216)      | -2.574 (0.010064)  | 2.992 (0.022626)    |
| (iii)        | $F \perp_{J_0} S \mid A, G$       | 13.010* (0.001496)      | -3.390* (0.000700) | 13.613* (0.001279)  |
|              | $F \perp_{J_0} S \mid A, G, M$    | 4.057 (0.131500)        | -2.088 (0.036799)  | 2.013 (0.118908)    |

172 (i)  $M \perp\!\!\!\perp S \mid A, G$ . We find significant evidence that metacognition of allostatic control ( $M$ ) and general self-efficacy ( $S$ ) are not in-  
 173 dependent conditional on age ( $A$ ) and gender ( $G$ ) across all three different conditional independence test methods. In other words,  
 174 we find a contradiction regarding the conditional independence of  $M$  and  $S$  given  $A, G$ , within the DAG  $J_0$ .

175 (ii)  $M \perp\!\!\!\perp D \mid F, A, G$  and  $M \perp\!\!\!\perp D \mid F, A, G, S$ . We find significant evidence that  $M$  and depression ( $D$ ) are not independent conditional  
 176 on fatigue ( $F$ ),  $A, G$  across all three methods for conditional independence testing. This result is consistent with our findings for (i)  
 177 in the sense that if we add a directed edge from  $M$  to  $S$  in the DAG  $J_0$  (Figure 1), the only set of variables that  $d$ -separates  $M$  and  $D$   
 178 is the set  $F, A, G, S$  (and not  $F, A, G$ ). However, the results for conditional independence tests of  $M$  and  $D$  conditional on  $F, A, G, S$   
 179 are mixed with 2 out of 3 tests (GCM and KCI) not reaching the pre-specified significance level  $\alpha = 0.01$ . Hence further evidence is  
 180 needed to draw conclusions regarding the statement  $M \perp\!\!\!\perp D \mid F, A, G, S$ .

181 (iii)  $F \perp\!\!\!\perp S \mid A, G$  and  $F \perp\!\!\!\perp S \mid A, G, M$ . When looking at the conditional independence between  $F$  and  $S$ , the results depend on  
 182 the set of variables that we condition on. We find significant evidence that  $F$  and  $S$  are not independent conditional on  $A, G$  across  
 183 all three different test methods. However, we fail to reject the null hypothesis that  $F$  and  $S$  are independent conditional on the set  
 184  $M, A, G$  consistently across all three different test methods. This result is also in line with our findings for (i) in the sense that if we  
 185 add a directed edge from  $M$  to  $S$  in the DAG  $J_0$  (Figure 1), the only set of variables that  $d$ -separates  $F$  and  $S$  is the set  $M, A, G$ .

### 186 Estimating the average causal effect from $M$ to $F$

187 As predicted by the ASE theory, we find significant evidence for a negative average causal effect from metacognition of allostatic  
 188 control ( $M$ ) to fatigue ( $F$ )  $\frac{\partial}{\partial m} \mathbb{E}_{do(M:=m)} [F] = \theta_3$  across all three different estimation methods. The resulting estimates  $\hat{\theta}_3$  for the VAS  
 189  $\mathbf{Z} = (A, G)$  are displayed in Table 2 alongside lower and upper bounds of a 95% confidence interval for  $\hat{\theta}_3$ , the corresponding value  
 190 of the  $t$ -statistic as well as the  $p$ -value for the one-sided  $t$ -test.

**Table 2: Average causal effect from  $M$  to  $F$  using  $\mathbf{Z} = (A, G)$ .** Displayed are estimates of the average causal effect from  $M$  to  $F$   $\hat{\theta}_3$  across three different methods to adjust for the covariates  $\mathbf{Z} = (A, G)$ . We report a point estimate  $\hat{\theta}_3$ , the lower and upper bounds of a 95% confidence interval for  $\hat{\theta}_3$ , the value of the  $t$ -statistic as well as the  $p$ -value for the one-sided  $t$ -test. An asterisk indicates a statistical significance using the pre-specified level  $\alpha = 0.017$  (Bonferroni-corrected).

| estimation method | $\hat{\theta}_3$ | confidence interval |         | $t$ value | $p$ -value |
|-------------------|------------------|---------------------|---------|-----------|------------|
| linear regression | -0.4845*         | -0.712              | -0.257  | -4.259    | 3.968e-05  |
| propensity score  | -0.4816*         | -0.717              | -0.246  | -4.092    | 6.689e-05  |
| DML               | -0.3872*         | -0.6481             | -0.1262 | -2.9082   | 0.0018     |

191 The results from our sensitivity analysis, i.e. estimating  $\theta_3$  using a different VAS  $\mathbf{Z} = (A, G, S)$ , are listed in Table 3. They confirm the  
 192 finding of a negative average causal effect from  $M$  to  $F$  when using  $\mathbf{Z} = (A, G)$  as a VAS. The main difference between the results  
 193 of the two analyses are that the second analysis using  $\mathbf{Z} = (A, G, S)$  yields a slightly lower absolute value for  $\hat{\theta}_3$  as well as a non-  
 194 significant  $p$ -value using the DML method.

**Table 3: Average causal effect from  $M$  to  $F$  using  $\mathbf{Z} = (A, G, S)$ .** Displayed are estimates of the average causal effect from  $M$  to  $F$   $\hat{\theta}_3$  across three different methods to adjust for the covariates  $\mathbf{Z} = (A, G, S)$ . We report a point estimate of  $\hat{\theta}_3$ , the lower and upper bounds of a 95% confidence interval for  $\hat{\theta}_3$ , the value of the  $t$ -statistic as well as the  $p$ -value for the one-sided  $t$ -test. An asterisk indicates a statistical significance using the pre-specified level  $\alpha = 0.017$  (Bonferroni-corrected).

| estimation method | $\hat{\theta}_3$ | confidence interval |        | $t$ value | $p$ -value |
|-------------------|------------------|---------------------|--------|-----------|------------|
| linear regression | -0.3545*         | -0.610              | -0.099 | -2.785    | 0.0037     |
| propensity score  | -0.3775*         | -0.692              | -0.063 | -2.400    | 0.0098     |
| DML               | -0.2049          | -0.563              | 0.153  | -1.122    | 0.1309     |

## 195 Estimating the average causal effect from $F^*S$ to $D$

196 We do not find evidence for the predicted negative average causal effect of the interaction term between fatigue and general self-  
197 efficacy ( $F^*S$ ) on depression ( $D$ )  $\frac{\partial}{\partial f \partial s} \mathbb{E}_{do(F:=f, S:=s)} [D] = \theta_{10}$  across all three different estimation methods for both VAS  $\mathbf{Z} = (A, G)$   
198 and  $\mathbf{Z} = (A, G, M)$ . Tables containing the resulting estimates for  $\hat{\theta}_{10}$  including a 95% confidence interval and the value of the  $t$ -  
199 statistic as well as the  $p$ -value for the one-sided  $t$ -test are listed in the Appendix C.

## 200 DISCUSSION

201 In this paper, we proposed a formulation of the allostatic self-efficacy (ASE) theory of fatigue and depression in the language of causal  
202 inference. Specifically, we identified the variables of central interest to the ASE theory and formulated a structural causal model (SCM)  
203 under assumptions of linearity and normality. The SCM as well as the induced directed acyclic graph (DAG) describe the direction of  
204 causality among these variables. Using data of 60 healthy individuals from a previous study on interoception of breathing and its  
205 relation with several psychopathological constructs<sup>14</sup>, we tested the proposed causal model empirically. Relying on the assumption  
206 of the Markov condition, we used the dataset to search for contradictions to conditional independence statements (Hypothesis 1)  
207 that are implied by the graph structure ( $d$ -separation). In a second and third step, we estimated the value of two causal effects that  
208 are predicted by the ASE theory using methods of covariate adjustment, propensity scores and double/debiased machine learning.  
209 As predicted by the ASE theory, we found a statistically significant negative average causal effect from metacognition of allostatic  
210 control ( $M$ ) to fatigue ( $F$ )  $\frac{\partial}{\partial m} \mathbb{E}_{do(M:=m)} [F] = \theta_3$  across all three methods of estimation. Our sensitivity analysis using a different valid  
211 adjustment set largely confirmed this finding with two out of three estimation methods yielding a significant result.

212 The assumption of the Markov condition establishes a connection from  $d$ -separation statements in a causal graph to conditional  
213 independence statements in the distribution. In the analysis of Hypothesis 1, we tested concrete predictions implied by the DAG  
214  $J_0$  (Figure 1). (i) Using the the data from the PBIHB study, we were able to reject the null hypothesis of  $M \perp\!\!\!\perp S \mid A, G$  at the pre-  
215 specified level  $\alpha = 0.01$ . (ii) We found significant evidence against  $M \perp\!\!\!\perp D \mid F, A, G$  in the empirical data set. However, in line with  
216 the graph structure  $J_0$  implied by the ASE theory, we did not find clear evidence against  $M \perp\!\!\!\perp D \mid F, A, G, S$ . That is, only one out  
217 of three conditional independence tests rejected the null hypothesis of metacognition of allostatic control ( $M$ ) being independent  
218 from depression ( $D$ ) conditional on the set  $F, A, G, S$ . (iii) We also found significant evidence against  $F \perp\!\!\!\perp S \mid A, G$  in the empirical  
219 data. Yet, we did not find any evidence against (iii)  $F \perp\!\!\!\perp S \mid A, G, M$ . All three conditional independence test methods consistently  
220 failed to reject the null hypothesis of fatigue ( $F$ ) and general self-efficacy ( $S$ ) being independent given the set  $A, G, D, M$ .

221 There are a number of potential explanations for the results related to Hypothesis 1. The most straightforward explanation is that  
222 the proposed causal model is incorrect. This can include the presence of additional edges between nodes as well as variables that  
223 were not considered acting as mediators or confounds or a combination of all of the aforementioned. For example, although the  
224 ASE theory does not make an explicit statement about a direct link between metacognition of allostatic control ( $M$ ) and general  
225 self-efficacy ( $S$ ), it is plausible to assume the existence of a directed edge from  $M$  (the feeling of control over bodily states) to  $S$  (an  
226 individuals general expectation of personal mastery and control<sup>4</sup>). The construct of  $S$  is closely related to concepts of metacog-  
227 nition (see e.g.<sup>9</sup>) and represents a "global" construct of self-beliefs about one's capacity to achieve goals and overcome adversity;  
228 this can be understood as including more "local" domain-specific forms of self-efficacy, such as metacognition of allostatic control.  
229 From this view, the idea that metacognition of allostatic control ( $M$ ) may contribute to (and thus influence) beliefs of general self-  
230 efficacy ( $S$ ) is therefore not entirely unreasonable and would be a potential explanation for the results of (i) and (iii). More precisely,  
231 a directed edge from  $M$  to  $S$  would render  $M$  and  $S$   $d$ -connected, since there would always exist a path between  $M$  and  $S$  that is  
232 not blocked by any set of variables. This cause-effect structure would explain the observed dependence between the two variables  
233 in the empirical data set according to Reichenbach's common cause principle<sup>29</sup>. Another consequence of introducing an edge  
234 from  $M$  to  $S$  would be that the set of variables that  $d$ -separates  $F$  and  $S$  would consist of variables  $A, G, M$  and not  $A, G$  only, which  
235 corresponds to our findings for (iii). The same is true for the set of variables  $d$ -separating  $M$  and  $D$ , which would consist of variables  
236  $F, A, G, S$  and not  $F, A, G$  in this case, potentially explaining our findings for (ii). However, since the evidence for (ii)  $M \perp\!\!\!\perp D \mid F, A, G, S$   
237 was mixed, further research needs to bring clarity to the question of (conditional) independence of  $M$  and  $D$ .



238 The revised DAG  $J_1$  (Figure 3) provides a graphical summary of the above considerations regarding the results related to Hypoth-  
239 esis 1. From DAG  $J_0$  to  $J_1$ , we added a directed edge from  $M$  to  $S$ . However, there are several other potential explanations for the  
240 observed results, so this example should by no means be taken as "the correct model". If anything, this should be regarded as an  
241 updated hypothesis to be tested in future investigations.

## DAG $J_1$

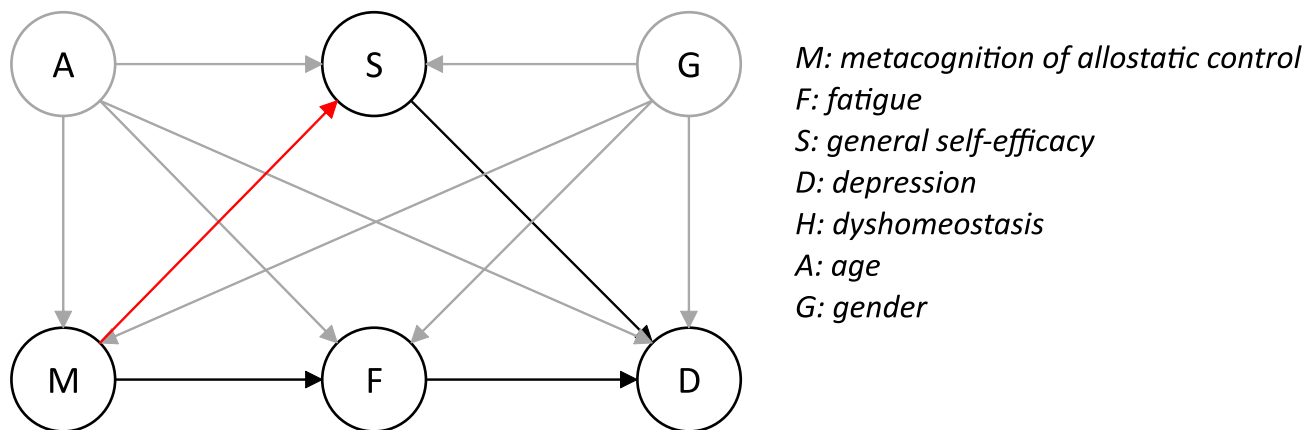

**Figure 3:** Updated directed acyclic graph (DAG)  $J_1$  of the allostatic self-efficacy theory (ASE;<sup>40</sup>) providing one potential explanation for the observed results from analysis of Hypothesis 1. Modifications from DAG  $J_0$  to  $J_1$  are shown in red.

242 Concerning Hypothesis 2, we found evidence for a negative average causal effect from metacognition of allostatic control ( $M$ ) to fati-  
243 gue ( $F$ )  $\frac{\partial}{\partial m} \mathbb{E}_{do(M:=m)} [F] = \theta_3$  across all three estimation methods (covariate adjustment, propensity scores, DML) for two differ-  
244 ent VAS. This is in line with the prediction by the ASE theory that the subjective experience of fatigue arises as a consequence of a  
245 metacognitive diagnosis that the brain's control over bodily states is failing (low allostatic control). This also confirms findings from  
246 previous research, which identified metacognition of allostatic control ( $M$ ) (operationalised by the sum of the subscales 3 and 8 of  
247 the MAIA questionnaire) to be associated with fatigue ( $F$ ) scores<sup>33</sup>. Our new results go beyond this previous finding, in the sense  
248 that the current study suggests a direction of the effect as opposed to purely associative statements. It is worth highlighting that  
249 the estimation of the causal effect from  $M$  to  $F$  would not be affected by the proposed additional link between  $M$  to  $S$  as suggested  
250 by the analysis results concerning Hypothesis 1 (i) (see Figure 3) since the set  $A, G$  would still be a valid adjustment set (VAS).

251 With regard to Hypothesis 3, we did not find evidence for a negative average causal effect of the interaction term between fatigue  
252 and general self-efficacy ( $F*S$ ) on depression ( $D$ )  $\frac{\partial}{\partial f \partial s} \mathbb{E}_{do(F:=f, S:=s)} [D] = \theta_{10}$ . The present work is, to the best of our knowledge,  
253 the first attempt to investigate the predicted influence of the interaction between fatigue and general self-efficacy on depression.  
254 Across all three different estimation methods and using different VAS, we found, if anything, very small effects. However, one may  
255 rightfully question whether the sample in this study was adequate for testing Hypothesis 3, at least in the context of the ASE theory.  
256 This is because our participants were drawn from the general population and, not surprisingly, did not show pronounced levels of  
257 depression (compare Figure 2). By contrast, predictions of the ASE theory concerning depression assume a clinically relevant state  
258 of depression<sup>40</sup>. Therefore, the potential interaction effect  $F*S$  on  $D$  remains an open question that should be addressed in the fu-  
259 ture, using samples with clinically relevant levels of depression.

260 The present study has a number of limitations. First of all, we are limited by certain features of the dataset at hand. In addition to  
261 the low levels of depression discussed above, the sample size ( $N=60$ ) is relatively small. Therefore, it will be crucial to see whether  
262 our findings can be reproduced in larger population samples. Moreover, the dataset is purely observational, meaning that there are  
263 no interventions on any of the variables of interest. This makes the problem of causal inference (even more) challenging. A logical  
264 aim for future studies would be to use variables like  $M$  as targets for cognitive interventions.

265 Additionally, our analysis relies on the assumption that we have access to valid measurements of the variables in our SCM. While  
266 we employed validated and widely used measures for fatigue, depression, and general self-efficacy, there does not yet exist a val-

267 idated measurement tool that was specifically developed for the construct of metacognition of allostatic control ( $M$ ). Here, as in  
268 previous research<sup>33</sup>, we used a plausible proxy measure, the sum of the MAIA subscales 3 and 8 (for a detailed motivation, please  
269 see the Methods section). An important goal for future research is the development and validation of easily applicable readouts for  
270 metacognition of allostatic control ( $M$ ).

271 Beyond the limitations of the dataset, our proposed SCM of the ASE theory is arguably only a crude approximation to reality. The  
272 most obvious concern is the one of unobserved confounds, which we articulated in more detail in the discussion of the results from  
273 Hypothesis 1. More specifically, one important limitation of the present study is that our SCM does not include sleep. While sleep  
274 is not an explicit component of the ASE theory, previous work has repeatedly demonstrated the importance of sleep quality for fa-  
275 tigue (e.g.<sup>19,33</sup>). In the present study, we did not examine the potential influence of sleep since the available dataset did not include  
276 any measures of sleep quality.

277 A second limitation is that we adopt the common assumption that all effects are linear and that all of the random variables follow  
278 a normal distribution (except gender). These assumptions of linearity and normality should be kept in mind when interpreting our  
279 findings for Hypotheses 2 and 3. Another potential drawback of our SCM is that we did not explicitly consider the role of time. Most  
280 of the variables in our SCM are plausibly considered to be dynamic states, i.e. their values are likely to change over time. In this work,  
281 we used a dataset representing a snapshot in time and implicitly assumed that the causal effects take place instantaneously. How-  
282 ever, it is plausible to assume that, for example, the effects of elevated fatigue levels do not immediately lead to elevated symptoms  
283 of depression, but that this effect evolves over timescales of weeks, months or even years.

284 Finally, there are numerous assumptions underlying our statistical tests. Conditional independence testing, which lies at the heart  
285 of causal discovery<sup>39</sup>, is one of its most challenging tasks<sup>34</sup>. For Hypothesis 1, we additionally rely on the assumption of the Markov  
286 condition. Without going into details for any of these assumptions, we highlight that the strongest of all the assumptions made  
287 throughout the entire analysis is the assumption of unconfoundedness. In other words, our results are based on the assumption  
288 that our proposed SCM contains all variables relevant for the phenomenon under consideration. However, it is likely that further  
289 variables exist that influence those in the proposed SCM (e.g. sleep, see above). The omission of these (partially unknown) variables  
290 may affect the results for all three hypotheses that we tested.

291 Despite the numerous limitations, this work also has several strengths worth highlighting. Foremost, we provided the first concrete  
292 formulation of the ASE theory in the language of causal inference. Our proposal of an SCM brings the content of a verbally formu-  
293 lated theory into the realm of concrete mathematical equations. Together with the induced DAG, they provide a formal basis for  
294 analysis and allowed us to identify a set of empirically testable hypotheses which may guide future research. Secondly, we used  
295 multiple independent methods for both conditional independence testing (Hypothesis 1) as well as the estimation of causal effects  
296 (Hypotheses 2 and 3). In this way, we are able to draw conclusions in that they do not depend on assumptions and properties of any  
297 single method. Last but not least, all of our hypotheses and statistical analysis procedures were pre-registered and specified in de-  
298 tail in an ex ante analysis plan (<https://doi.org/10.5281/zenodo.10559656>). Preregistration is an important and effective protection  
299 for the robustness of research, given the many degrees of freedom and the numerous cognitive biases that scientists may inadver-  
300 tently be affected by<sup>21</sup>.

## 301 CONCLUSIONS

302 In summary, our work provides a formal basis for testing predictions by the ASE theory of fatigue and depression in the context of  
303 causal inference. We evaluated central aspects of our proposed SCM using a publicly available dataset and provided an updated  
304 version of the SCM that accounts for our empirical findings. In addition, we were able to confirm previous findings regarding the as-  
305 sociation between metacognition of allostatic control ( $M$ ) and fatigue ( $F$ ). Our analysis enabled us to quantify the direction as well  
306 as the sign of the causal effect, i.e. we found a negative average causal effect from  $M$  to  $F$   $\frac{\partial}{\partial m} \mathbb{E}_{do(M:=m)} [F] = \theta_3$ , as predicted by  
307 the ASE theory. Finally, we identified a number of open questions that remain to be addressed in future research and that may help  
308 unravel the mechanisms behind fatigue and depression.

## ACKNOWLEDGMENTS

We wish to thank Jonas Peters for helpful discussions.

## AUTHOR CONTRIBUTIONS

Conceptualization, A.J.H., D.W., J.H. and K.E.S.; methodology, A.J.H., J.H. and K.E.S.; software, A.J.H. and D.W.; validation, D.W.; formal analysis, A.J.H.; investigation, A.J.H. and O.K.H.; resources, O.K.H. and K.E.S.; data curation, O.K.H.; writing—original draft preparation, A.J.H.; writing—review and editing, A.J.H., D.W., O.K.H., J.H. and K.E.S.; visualization, A.J.H.; supervision, K.E.S.; project administration, A.J.H.; funding acquisition, O.K.H. and K.E.S. All authors have read and agreed to the published version of the manuscript.

## FUNDING

This research was funded by the René and Susanne Braginsky Foundation, the ETH Foundation and the University of Zurich. O.K.H. (née Faull) was supported by a Marie Skłodowska-Curie Postdoctoral Fellowship from the European Union's Horizon 2020 research and innovation program under the grant agreement 793580, and a Rutherford Discovery Fellowship from the Royal Society Te Apurangi.

## AUTHOR COMPETING INTERESTS

The authors declare no conflicts of interest.

## AI ASSISTED TECHNOLOGIES

We did not use any AI assisted technologies, neither for data analysis nor during writing of the manuscript.

## REFERENCES

- [1] V. Ainley, M. A. J. Apps, A. Fotopoulou, and M. Tsakiris. Bodily precision: a predictive coding account of individual differences in interoceptive accuracy. *Philosophical Transactions of the Royal Society B: Biological Sciences*, 371(1708):20160003, Nov. 2016. doi: [10.1098/rstb.2016.0003](https://doi.org/10.1098/rstb.2016.0003). URL <https://royalsocietypublishing.org/doi/full/10.1098/rstb.2016.0003>. Publisher: Royal Society.
- [2] A. P. Association. *Diagnostic and Statistical Manual of Mental Disorders*. 5 edition, 2013. URL <https://dsm.psychiatryonline.org/doi/book/10.1176/appi.books.9780890425596>.
- [3] P. Bach, V. Chernozhukov, M. S. Kurz, and M. Spindler. DoubleML – An Object-Oriented Implementation of Double Machine Learning in R, Jan. 2023. URL <http://arxiv.org/abs/2103.09603>. arXiv:2103.09603 [cs, econ, stat].
- [4] A. Bandura. Self-efficacy: Toward a unifying theory of behavioral change. *Psychological Review*, 84(2):191–215, Mar. 1977. ISSN 0033295X. doi: [10.1037/0033-295X.84.2.191](https://doi.org/10.1037/0033-295X.84.2.191). URL <https://doi.org/10.1037/0033-295X.84.2.191>.
- [5] K. A. Bollen. *Structural equations with latent variables*. Structural equations with latent variables. John Wiley & Sons, Oxford, England, 1989. ISBN 978-0-471-01171-2. doi: [10.1002/9781118619179](https://doi.org/10.1002/9781118619179). Pages: xiv, 514.
- [6] S. Bongers, P. Forré, J. Peters, and J. M. Mooij. Foundations of structural causal models with cycles and latent variables. *The Annals of Statistics*, 49(5):2885–2915, Oct. 2021. ISSN 0090-5364, 2168-8966. doi: [10.1214/21-AOS2064](https://doi.org/10.1214/21-AOS2064). URL <https://projecteuclid.org/journals/annals-of-statistics/volume-49/issue-5/Foundations-of-structural-causal-models-with-cycles-and-latent-variables/10.1214/21-AOS2064.full>. Publisher: Institute of Mathematical Statistics.
- [7] A. Chaudhuri and P. O. Behan. Fatigue in neurological disorders. *The Lancet*, 363(9413):978–988, Mar. 2004. ISSN 0140-6736. doi: [10.1016/S0140-6736\(04\)15794-2](https://doi.org/10.1016/S0140-6736(04)15794-2). URL <https://www.sciencedirect.com/science/article/pii/S0140673604157942>.
- [8] V. Chernozhukov, D. Chetverikov, M. Demirer, E. Duflo, C. Hansen, W. Newey, and J. Robins. Double/debiased machine learning for treatment and structural parameters. *The Econometrics Journal*, 21(1):C1–C68, Feb. 2018. ISSN 1368-4221. doi: [10.1111/eectj.12097](https://doi.org/10.1111/eectj.12097). URL <https://doi.org/10.1111/eectj.12097>.
- [9] I. Clark and G. Dumas. The regulation of task performance: A trans-disciplinary review. *Frontiers in Psychology*, 6(JAN):1862, Jan. 2016. ISSN 16641078. doi: [10.3389/fpsyg.2015.01862](https://doi.org/10.3389/fpsyg.2015.01862). URL [www.frontiersin.org](http://www.frontiersin.org). Publisher: Frontiers Media SA.
- [10] J. D. Fisk, P. G. Ritvo, L. Ross, D. A. Haase, T. J. Marrie, and W. F. Schlech. Measuring the Functional Impact of Fatigue: Initial Validation of the Fatigue Impact Scale. *Clinical Infectious Diseases*, 18(Supplement\_1):S79–S83, Jan. 1994. ISSN 1058-4838. doi: [10.1093/clinids/18.Supplement\\_1.S79](https://doi.org/10.1093/clinids/18.Supplement_1.S79). URL [https://doi.org/10.1093/clinids/18.Supplement\\_1.S79](https://doi.org/10.1093/clinids/18.Supplement_1.S79).
- [11] S. M. Fleming and R. J. Dolan. The neural basis of metacognitive ability. *Philosophical Transactions of the Royal Society B: Biological Sciences*, 367(1594):1338–1349, 2012. ISSN 14712970. doi: [10.1098/rstb.2011.0417](https://doi.org/10.1098/rstb.2011.0417). Publisher: Royal Society.
- [12] K. Friston. A theory of cortical responses. *Philosophical Transactions of the Royal Society B: Biological Sciences*, 360(1456):815–836, Apr. 2005. ISSN 0962-8436. doi: [10.1098/rstb.2005.1622](https://doi.org/10.1098/rstb.2005.1622). URL <https://royalsocietypublishing.org/doi/10.1098/rstb.2005.1622>. Publisher: Royal Society.
- [13] K. J. Friston, J. Daunizeau, J. Kilner, and S. J. Kiebel. Action and behavior: a free-energy formulation. *Biological Cybernetics*, 102(3):227–260, Mar. 2010. ISSN 1432-0770. doi: [10.1007/s00422-010-0364-z](https://doi.org/10.1007/s00422-010-0364-z). URL <https://doi.org/10.1007/s00422-010-0364-z>.
- [14] O. K. Harrison, L. Köchli, S. Marino, R. Luechinger, F. Hennel, K. Brand, A. J. Hess, S. Frässle, S. Iglesias, F. Vinckier, F. H. Petzschnner, S. J. Harrison, and K. E. Stephan. Interoception of breathing and its relationship with anxiety. *Neuron*, 0(0):1–14, Oct. 2021. ISSN 0896-6273. doi: [10.1016/J.NEURON.2021.09.045](https://doi.org/10.1016/J.NEURON.2021.09.045). URL <http://www.cell.com/article/S0896627321007182/fulltext>. Publisher: Elsevier.
- [15] S. S. Khalsa, R. Adolphs, O. G. Cameron, H. D. Critchley, P. W. Davenport, J. S. Feinstein, J. D. Feusner, S. N. Garfinkel, R. D. Lane, W. E. Mehling, A. E. Meuret, C. B. Nemeroff, S. Oppenheimer, F. H. Petzschnner, O. Pollatos, J. L. Rhudy, L. P. Schramm, W. K. Simmons, M. B. Stein, K. E. Stephan, O. Van den Bergh, I. Van Diest, A. von Leupoldt, M. P. Paulus, V. Ainley, O. Al Zoubi, R. Uppercle, J. Avery, L. Baxter, C. Benke, L. Berner, J. Bodurka, E. Breese, T. Brown, K. Burrows, Y. H. Cha, A. Clausen, K. Cosgrove, D. Deville, L. Duncan, P. Duquette, H. Ekhtiari, T. Fine, B. Ford, I. Garcia Cordero, D. Gleghorn, Y. Guereca, N. A. Harrison, M. Hassanpour, T. Hechler, A. Heller, N. Hellman, B. Herbert, B. Jarrahi, K. Kerr, N. Kirlic, M. Klabunde, T. Kraynak, M. Kriegsmann, J. Kroll, R. Kuplicki, R. Lapidus, T. Le, K. L. Hagen, A. Mayeli, A. Morris, N. Naqvi, K. Oldroyd, C. Pané-Farré, R. Phillips, T. Poppa, W. Potter, M. Puhl, A. Saffron, M. Sala, J. Savitz, H. Saxon, W. Schoenhaus, C. Stanwell-Smith, A. Teed, Y. Terasawa, K. Thompson, M. Toups, S. Umeda, V. Upshaw, T. Victor, C. Wierenga, C. Wohlrab, H. W. Yeh, A. Yoris, F. Zeidan, V. Zotev, and N. Zucker. Interception and Mental Health: A Roadmap. *Biological Psychiatry: Cognitive Neuroscience and Neuroimaging*, 3(6):501–513, June 2018. ISSN 24519030. doi: [10.1016/j.bpsc.2017.12.004](https://doi.org/10.1016/j.bpsc.2017.12.004). Publisher: Elsevier Inc.
- [16] S. L. Lauritzen and S. L. Lauritzen. *Graphical Models*. Oxford Statistical Science Series. Oxford University Press, Oxford, New York, May 1996. ISBN 978-0-19-852219-5.
- [17] S. L. Lauritzen, A. P. Dawid, B. N. Larsen, and H.-G. Leimer. Independence properties of directed markov fields. *Networks*, 20(5):491–505, 1990. ISSN 1097-0037. doi: [10.1002/net.3230200503](https://doi.org/10.1002/net.3230200503). URL <https://onlinelibrary.wiley.com/doi/abs/10.1002/net.3230200503>.
- [18] Z. M. Manjaly, N. A. Harrison, H. D. Critchley, C. T. Do, G. Stefanics, N. Wenderoth, A. Lutterotti, A. Müller, and K. E. Stephan. Pathophysiological and cognitive mechanisms of fatigue in multiple sclerosis. *Journal of Neurology, Neurosurgery and Psychiatry*, 90(6):642–651, June 2019. ISSN 1468330X. doi: [10.1136/jnnp-2018-320050](https://doi.org/10.1136/jnnp-2018-320050). URL <http://jnnp.bmj.com/>. Publisher: BMJ Publishing Group.
- [19] V. Nociti, F. A. Losavio, V. Gnoni, A. Losurdo, E. Testani, C. Vollono, G. Frisullo, V. Brunetti, M. Mirabella, and G. Della Marca. Sleep and fatigue in multiple sclerosis: A questionnaire-based, cross-sectional, cohort study. *Journal of the Neurological Sciences*, 372:387–392, Jan. 2017. ISSN 0022-510X. doi: [10.1016/j.jns.2016.10.040](https://doi.org/10.1016/j.jns.2016.10.040). URL <https://www.sciencedirect.com/science/article/pii/S0022510X16306840>.
- [20] C. L. Nord and S. N. Garfinkel. Interoceptive pathways to understand and treat mental health conditions. *Trends in Cognitive Sciences*, 0(0), Apr. 2022. ISSN 1364-6613. doi: [10.1016/J.TICS.2022.03.004](https://doi.org/10.1016/J.TICS.2022.03.004). URL <http://www.cell.com/article/S1364661322000626/fulltext>. Publisher: Elsevier.
- [21] B. A. Nosek, C. R. Ebersole, C. A. DeHaven, and D. T. Mellor. The preregistration revolution. *Proceedings of the National Academy of Sciences*, 115(11):2600–2606, Mar. 2018. doi: [10.1073/pnas.1708274114](https://doi.org/10.1073/pnas.1708274114). URL <https://www.pnas.org/doi/10.1073/pnas.1708274114>. Publisher: Proceedings of the National Academy of Sciences.
- [22] W. H. Organization. *ICD-10: international statistical classification of diseases and related health problems : tenth revision*. World Health Organization, 2004. ISBN 978-92-4-154649-2. URL <https://iris.who.int/handle/10665/42980>. Accepted: 2012-06-16T14:40:38Z. Journal Abbreviation: ICD-10.
- [23] J. Pearl. Belief networks revisited. *Artificial Intelligence*, 59:49–56, 1993.
- [24] J. Pearl. Causal Diagrams for Empirical Research. *Biometrika*, 82(4):669–688, 1995. ISSN 0006-3444. doi: [10.2307/2337329](https://doi.org/10.2307/2337329). URL <https://www.jstor.org/stable/2337329>. Publisher: [Oxford University Press, Biometrika Trust].
- [25] J. Pearl. *Causality*. Cambridge University Press, Sept. 2009. ISBN 978-0-521-89560-6. Google-Books-ID: f4nuexNVZIC.
- [26] J. Peters, D. Janzing, and B. Schölkopf. *Elements of Causal Inference: Foundations and Learning Algorithms*. The MIT Press, 2017. URL <https://library.oxopen.org/handle/20.500.12657/26040>. Accepted: 2019-01-20 23:42:51.
- [27] F. H. Petzschnner, L. A. Weber, T. Gard, and K. E. Stephan. Computational Psychosomatics and Computational Psychiatry: Toward a Joint Framework for Differential Diagnosis. *Biological Psychiatry*, 82(6):421–430, Sept. 2017. ISSN 18732402. doi: [10.1016/j.biopsych.2017.05.012](https://doi.org/10.1016/j.biopsych.2017.05.012). Publisher: Elsevier USA.
- [28] G. Pezzulo, F. Rigoli, and K. Friston. Active Inference, homeostatic regulation and adaptive behavioural control. *Progress in Neurobiology*, 134:17–35, Nov. 2015. ISSN 18735118. doi: [10.1016/j.pneurobio.2015.09.001](https://doi.org/10.1016/j.pneurobio.2015.09.001). Publisher: Elsevier Ltd.
- [29] H. Reichenbach. *The Direction of Time*. Dover Publications, Mineola, N.Y., 1956.
- [30] J. Robins. A new approach to causal inference in mortality studies with a sustained exposure period/application to control of the healthy worker survivor effect. *Mathematical Modelling*, 7(9):1393–1512, Jan. 1986. ISSN 0270-0255. doi: [10.1016/0270-0255\(86\)90088-6](https://doi.org/10.1016/0270-0255(86)90088-6). URL <https://www.sciencedirect.com/science/article/pii/0270025586900886>.
- [31] J. M. Robins, M. A. Hernan, and B. Brumback. Marginal Structural Models and Causal Inference in Epidemiology. *Epidemiology*, 11(5):550, Sept. 2000. ISSN 1044-3983. URL [https://journals.lww.com/epidem/fulltext/2000/09000/marginal\\_structural\\_models\\_and\\_causal\\_inference\\_in.11.aspx](https://journals.lww.com/epidem/fulltext/2000/09000/marginal_structural_models_and_causal_inference_in.11.aspx).

- [32] P. R. Rosenbaum and D. B. Rubin. The central role of the propensity score in observational studies for causal effects. *Biometrika*, 70(1):41–55, Apr. 1983. ISSN 0006-3444. doi: [10.1093/biomet/70.1.41](https://doi.org/10.1093/biomet/70.1.41). URL <https://doi.org/10.1093/biomet/70.1.41>.
- [33] M. Rouault, I. Pereira, H. Galioulline, S. M. Fleming, K. E. Stephan, and Z.-M. Manjaly. Interoceptive and metacognitive facets of fatigue in multiple sclerosis. *European Journal of Neuroscience*, 58(2):2603–2622, 2023. ISSN 1460-9568. doi: [10.1111/ejn.16048](https://doi.org/10.1111/ejn.16048). URL <https://onlinelibrary.wiley.com/doi/abs/10.1111/ejn.16048>.
- [34] J. Runge. Conditional independence testing based on a nearest-neighbor estimator of conditional mutual information. In *Proceedings of the Twenty-First International Conference on Artificial Intelligence and Statistics*, pages 938–947. PMLR, Mar. 2018. URL <https://proceedings.mlr.press/v84/runge18a.html>. ISSN: 2640-3498.
- [35] M. Scutari. Learning Bayesian Networks with the bnlearn R Package. *Journal of Statistical Software*, 35:1–22, July 2010. ISSN 1548-7660. doi: [10.18637/jss.v035.i03](https://doi.org/10.18637/jss.v035.i03). URL <https://doi.org/10.18637/jss.v035.i03>.
- [36] A. K. Seth. Interoceptive inference, emotion, and the embodied self. *Trends in Cognitive Sciences*, 17(11):565–573, Nov. 2013. ISSN 1364-6613. doi: [10.1016/j.tics.2013.09.007](https://doi.org/10.1016/j.tics.2013.09.007). Publisher: Elsevier Current Trends.
- [37] A. K. Seth, K. Suzuki, and H. D. Critchley. An interoceptive predictive coding model of conscious presence. *Frontiers in Psychology*, 3(JAN):395, Jan. 2012. ISSN 1664-1078. doi: [10.3389/fpsyg.2011.00395](https://doi.org/10.3389/fpsyg.2011.00395). URL [www.frontiersin.org](http://www.frontiersin.org). Publisher: Frontiers.
- [38] R. D. Shah and J. Peters. The hardness of conditional independence testing and the generalised covariance measure. *The Annals of Statistics*, 48(3):1514–1538, June 2020. ISSN 0090-5364, 2168-8966. doi: [10.1214/19-AOS1857](https://doi.org/10.1214/19-AOS1857). URL <https://projecteuclid.org/journals/annals-of-statistics/volume-48/issue-3/The-hardness-of-conditional-independence-testing-and-the-generalised-covariance/10.1214/19-AOS1857.full>. Publisher: Institute of Mathematical Statistics.
- [39] P. Spirtes, C. N. Glymour, and R. Scheines. *Causation, Prediction, and Search*. MIT Press, 2000. ISBN 978-0-262-19440-2.
- [40] K. E. Stephan, Z. M. Manjaly, C. D. Mathys, L. A. Weber, S. Paliwal, T. Gard, M. Tittgemeyer, S. M. Fleming, H. Haker, A. K. Seth, and F. H. Petzschner. Allostatic self-efficacy: A metacognitive theory of dyshomeostasis-induced fatigue and depression. *Frontiers in Human Neuroscience*, 10(NOV2016):550, Nov. 2016. ISSN 1662-5161. doi: [10.3389/fnhum.2016.00550](https://doi.org/10.3389/fnhum.2016.00550). URL [www.frontiersin.org](http://www.frontiersin.org). Publisher: Frontiers Media S. A.
- [41] B. Toussaint, J. Heinze, and K. E. Stephan. A computationally informed distinction of interoception and exteroception. *Neuroscience & Biobehavioral Reviews*, 159: 105608, Apr. 2024. ISSN 0149-7634. doi: [10.1016/j.neubiorev.2024.105608](https://doi.org/10.1016/j.neubiorev.2024.105608). URL <https://www.sciencedirect.com/science/article/pii/S0149763424000770>.
- [42] W. M. v. d. Wal and R. B. Geskus. ipw: An R Package for Inverse Probability Weighting. *Journal of Statistical Software*, 43:1–23, Sept. 2011. ISSN 1548-7660. doi: [10.18637/jss.v043.i13](https://doi.org/10.18637/jss.v043.i13). URL <https://doi.org/10.18637/jss.v043.i13>.
- [43] S. Weichwald and J. Peters. Causality in Cognitive Neuroscience: Concepts, Challenges, and Distributional Robustness. *Journal of Cognitive Neuroscience*, 33(2):226–247, Feb. 2021. ISSN 1530-8898. doi: [10.1162/jocn\\_a\\_01623](https://doi.org/10.1162/jocn_a_01623).
- [44] S. Wessely. Chronic Fatigue: Symptom and Syndrome. *Annals of Internal Medicine*, 134(9\_Part\_2):838–843, May 2001. ISSN 0003-4819. doi: [10.7326/0003-4819-134-9-Part\\_2-200105011-00007](https://doi.org/10.7326/0003-4819-134-9-Part_2-200105011-00007). URL [https://www.acpjournals.org/doi/10.7326/0003-4819-134-9-part\\_2-200105011-00007](https://www.acpjournals.org/doi/10.7326/0003-4819-134-9-part_2-200105011-00007). Publisher: American College of Physicians.
- [45] K. Zhang, J. Peters, D. Janzing, and B. Schoelkopf. Kernel-based Conditional Independence Test and Application in Causal Discovery, Feb. 2012. URL <http://arxiv.org/abs/1202.3775>. arXiv:1202.3775 [cs, stat].

## APPENDIX A. DEFINITIONS

### A1. Structural Causal Model

We adopt the definition of SCMs according to <sup>43</sup>:

**Definition 1.** An SCM over variables  $\mathbf{X} = [X_1, \dots, X_n]$  comprises

- structural equations which relate each variable  $X_k$  to its parents  $\mathbf{PA}(X_k) \subseteq \{X_1, \dots, X_n\}$  and a noise variable  $N_k$  via a function  $f_k$  such that  $X_k := f_k(\mathbf{PA}(X_k), N_k)$ , as well as a
- noise distribution  $\mathbb{P}_N$  of the noise variables  $\mathbf{N} = [N_1, \dots, N_n]^T$ .

In a directed causal graph associated with an SCM, the nodes correspond to the variables  $X_1, \dots, X_n$  and there is an edge from  $X_i$  to  $X_j$  whenever  $X_i$  appears on the right hand side of the equation  $X_j := f_j(\mathbf{PA}(X_j), N_j)$ . In other words, if  $X_i \in \mathbf{PA}(X_j)$  the graph contains the edge  $X_i \rightarrow X_j$ . For this work, we assume that the graph does not contain any cycles. The structural equations together with the noise distributions induce the observational distribution  $\mathbb{P}_X$  of  $X_1, \dots, X_n$  as simultaneous solution to the equations.

### A2. Markov condition

**Definition 2.** Given a DAG  $G$  over nodes  $\mathbf{X}$ , we say that the distribution  $\mathbb{P}_X$  satisfies

- the **global Markov property** (MP) with respect to  $G$  if  $\forall$  disjoint  $A, B, C \subseteq \mathbf{X}$   
 $A$   $d$ -sep  $B \mid C \implies A \perp\!\!\!\perp B \mid C$
- the **local Markov property** (MP) if  $\forall j$   $X_j \perp\!\!\!\perp ND_j \mid PA_j$
- the **factorisation property** if  $\mathbb{P}_X$  is absolutely constant with respect to a product measure and  $\forall x \forall j$ ,  $p(x_{PA_j}) > 0 : p(\mathbf{x}) = p(x_1, \dots, x_d) = \prod_j^d p(x_j \mid x_{PA_j})$

In the above definition, we used the following notation:  $ND_j$  represent the non-descendants of node  $X_j$  and  $PA_j$  denotes all nodes that have a directed edge to node  $X_j$ .

### A3. $d$ -separation

**Definition 3.**  $d$ -separation is a graphical criterion whether two nodes are connected or not. Let  $\mathbf{X}, \mathbf{Y}, \mathbf{Z}$  disjoint.

- A path  $X = i_1, \dots, i_m = Y$  is blocked by  $\mathbf{Z} \iff \exists$  node  $i_k$  with  $i_{k-1} \rightarrow i_k \rightarrow i_{k+1}$  and  $i_k \in \mathbf{Z}$   
OR  $\exists$  node  $i_k$  with  $i_{k-1} \leftarrow i_k \leftarrow i_{k+1}$  and  $i_k \in \mathbf{Z}$   
OR  $\exists$  node  $i_k$  with  $i_{k-1} \leftarrow i_k \rightarrow i_{k+1}$  and  $i_k \in \mathbf{Z}$   
OR  $\exists$  node  $i_k$  with  $i_{k-1} \rightarrow i_k \leftarrow i_{k+1}$  and  $i_k \notin \mathbf{Z}$  and  $DE(i_k) \cap \mathbf{Z} = \emptyset$
- $\mathbf{X}, \mathbf{Y}$  are  $d$ -connected given  $\mathbf{Z} \iff \exists X \in \mathbf{X}, Y \in \mathbf{Y}$  s.t.  $\exists$  path between  $X$  and  $Y$  that is not blocked
- if  $\mathbf{X}, \mathbf{Y}$  are not  $d$ -connected, then they are  $d$ -separated. We sometimes write  $\mathbf{X}$   $d$ -sep  $\mathbf{Y} \mid \mathbf{Z}$  or  $\mathbf{X} \perp\!\!\!\perp_G \mathbf{Y} \mid \mathbf{Z}$

## APPENDIX B. ESTIMATING CAUSAL EFFECTS USING COVARIATE ADJUSTMENT

### B1. The "propensity score" method

In a point treatment situation one can adjust for a set of confounders  $\mathbf{Z} = (A, G)$  when estimating the effect of exposure  $M$  by weighting observations  $i$  by the inverse probability weights

$$w_i = \frac{1}{P(M_i = m_i \mid \mathbf{Z}_i = \mathbf{z}_i)} \quad (15)$$

To increase statistical efficiency, one can use stabilised weights, e.g.

$$sw_i = \frac{P(M_i = m_i)}{P(M_i = m_i \mid \mathbf{Z}_i = \mathbf{z}_i)} \quad (16)$$

When dealing with a continuous exposure variable  $M$ , one can use stabilised weights

$$sw_i = \frac{f(m_i)}{f(m_i \mid \mathbf{z}_i)} \quad (17)$$

where  $f(m_i)$  is the marginal density function of  $M$ , evaluated at the observed value in unit  $i$ ,  $m_i$ , and  $f(m_i \mid \mathbf{z}_i)$  conditional density function of  $M$  given  $\mathbf{Z}$ , evaluated at the observed values in unit  $i$ ,  $\{m_i, \mathbf{z}_i\}$  <sup>42</sup>. Weighting observations  $i$  by  $sw_i$ , one can fit a causal model, for instance a marginal structural model (MSM)

$$\mathbb{E}[F_m] = \beta_0 + \theta_3 m \quad (18)$$

with continuous outcome fatigue  $F$ . The response variable  $F_m$  is the potential outcome that could have been observed in a unit under study, when that unit would have received a specific treatment level  $m$  <sup>31</sup>. The expectation  $\mathbb{E}[F_m]$  is the mean outcome, when all units under study would have received a specific treatment level  $m$ . Parameter  $\theta_3$  then quantifies the causal effect of  $M$  on  $F$  <sup>42</sup>.

## B2. Double/Debiased Machine Learning

DML removes the impact of regularisation bias and overfitting on estimation of the parameter of interest  $\theta_3$  by using Neyman-orthogonal moments and cross-fitting<sup>8</sup>. One application of DML is in the context of a partial linear regression model,

$$F = M\theta_3 + J_0(\mathbf{Z}) + N_f, \quad \mathbb{E}(N_f | M, \mathbf{Z}) = 0, \quad (19)$$

$$M = m_0(\mathbf{Z}) + V, \quad \mathbb{E}(V | \mathbf{Z}) = 0, \quad (20)$$

with fatigue  $F$ , metacognition of allostatic control  $M$ , a VAS  $\mathbf{Z} = (A, G)$  consisting of confounding covariates and stochastic error terms  $N_f$  and  $V$ . The confounding covariates  $\mathbf{Z}$  affect  $M$  and  $F$  via the functions  $m_0$  and  $J_0$ , respectively. DML can be used to estimate  $\theta_3$ , i.e. the main regression coefficient that we would like to infer, which can be interpreted as the average causal effect from  $M$  to  $F$ <sup>3</sup>.

## APPENDIX C. RESULTS FROM ESTIMATING THE AVERAGE CAUSAL EFFECT FROM $F^*S$ TO $D$

**Table 4: Average causal effect of the interaction term  $F^*S$  to  $D$  using  $\mathbf{Z} = (A, G)$ .** Displayed are estimates of the average causal effect of the interaction term  $F^*S$  to  $D$   $\hat{\theta}_{10}$  across three different methods to adjust for the covariates  $\mathbf{Z} = (A, G)$ . We report a point estimate of  $\hat{\theta}_{10}$ , the lower and upper bounds of a 95% confidence interval for  $\hat{\theta}_{10}$ , the value of the  $t$ -statistic as well as the  $p$ -value for the one-sided  $t$ -test. An asterisk indicates a statistical significance using the pre-specified level  $\alpha = 0.017$  (Bonferroni-corrected).

| estimation method | $\hat{\theta}_{10}$ | confidence interval | $t$ value | $p$ -value |
|-------------------|---------------------|---------------------|-----------|------------|
| linear regression | 0.0281              | -0.191 0.247        | 0.257     | 0.6010     |
| propensity score  | 0.0142              | -0.151 0.180        | 0.172     | 0.5680     |
| DML               | -0.2051             | -0.476 0.066        | -1.482    | 0.0691     |

**Table 5: Average causal effect of the interaction term  $F^*S$  to  $D$  using  $\mathbf{Z} = (A, G, M)$ .** Displayed are estimates of the average causal effect of the interaction term  $F^*S$  to  $D$   $\hat{\theta}_{10}$  across three different methods to adjust for the covariates  $\mathbf{Z} = (A, G, M)$ . We report a point estimate of  $\hat{\theta}_{10}$ , the lower and upper bounds of a 95% confidence interval for  $\hat{\theta}_{10}$ , the value of the  $t$ -statistic as well as the  $p$ -value for the one-sided  $t$ -test. An asterisk indicates a statistical significance using the pre-specified level  $\alpha = 0.017$  (Bonferroni-corrected).

| estimation method | $\hat{\theta}_{10}$ | confidence interval | $t$ value | $p$ -value |
|-------------------|---------------------|---------------------|-----------|------------|
| linear regression | 0.0671              | -0.122 0.257        | 0.711     | 0.7599     |
| propensity score  | 0.0337              | -0.159 0.227        | 0.350     | 0.6362     |
| DML               | 0.0153              | -0.283 0.314        | 0.100     | 0.5399     |
